# Supplementary material for: CD74 as a prognostic and M1 macrophage infiltration marker in a comprehensive pan-cancer analysis
Source: Sci Rep. 2024 Apr 7;14:8125. doi: 10.1038/s41598-024-58899-7 (PMC10998849; doi:10.1038/s41598-024-58899-7)
Supplement: Supplementary file 3 — Supplementary Tables. [file 41598_2024_58899_MOESM3_ESM.xlsx]

## Sheet: S1
Supplementary Table 1. List of abbreviations
Full name	Abbreviations
adrenocortical carcinoma	ACC
bladder urothelial carcinoma	BLCA
breast invasive carcinoma	BRCA
Clear cell renal cell carcinoma	ccRCC
cervical squamous cell carcinoma and endocervical adenocarcinoma	CESC
cholangiocarcinoma	CHOL
colon adenocarcinoma	COAD
disease-free interval	DFI
lymphoid neoplasm diffuse large B-cell lymphoma	DLBC
disease-specific survival	DSS
esophageal carcinoma	ESCA
glioblastoma multiforme	GBM
head and neck squamous cell carcinoma	HNSC
kidney chromophobe	KICH
kidney renal clear cell carcinoma	KIRC
kidney renal papillary cell carcinoma	KIRP
brain lower-grade glioma	LGG
liver hepatocellular carcinoma	LIHC
lung adenocarcinoma	LUAD
lung squamous cell carcinoma	LUSC
mesothelioma	MESO
overall survival	OS
ovarian serous cystadenocarcinoma	OV
pancreatic adenocarcinoma	PAAD
pheochromocytoma and paraganglioma	PCPG
progression-free interval	PFI
prostate adenocarcinoma	PRAD
rectum adenocarcinoma	READ
sarcoma	SARC
skin cutaneous melanoma	SKCM
stomach adenocarcinoma	STAD
testicular germ cell tumors	TGCT
thyroid carcinoma	THCA
uterine corpus endometrial carcinoma	UCEC
uterine carcinosarcoma	UCS
Thymoma	THYM
Uveal Melanoma	UVM
acute myeloid leukemia	LAML
The Cancer Genome Atlas	TCGA
Genotype-Tissue Expression	GTEx
tumor microenvironment	TME
endemic Burkitt's lymphoma	eBL
gastric adenocarcinoma	GA
chloride ion intracellular channel 1	CLIC1
cytotoxic T lymphocytes	CTLs
simple-nucleotide variation	SNV
transcripts per million	TPM
The Clinical Proteomic Tumor Analysis Consortium	CPTAC
The University of Alabama at Birmingham Cancer data analysis Portal	UALCAN
receiver operating characteristic curves	ROC
confidence intervals	CI
hazard ratio	HR
Tumor Immune Dysfunction and Exclusion	TIDE
copy number variations	CNV
tumor mutation burden	TMB
microsatellite instability	MSI
homologous recombination deficiency	HRD
mismatching repair	MMR
homologous recombination repair	HHR
Gene Expression Profiling Interactive Analysis	GEPIA
differentially methylated probes-based stemness index	DMPsi
N1‐methyladenosine	m1A
5‐methylcytosine	m5C
N6‐methyladenosine	m6A
the percent spliced-in	PSI
protein–protein interaction	PPI
Gene Ontology	GO
false discovery rate	FDR
Gene Set Enrichment Analysis	GSEA
Estimation of Stromal and Immune Cells in Malignant Tumor Tissues Using Expression Data	ESTIMATE
breast cancer	BC
the Tumor Immune Single-cell Hub	TISCH
bovine serum albumin	BSA
tyramide signal amplification	TSA
4′,6- diamidino-2-phenylindole dihydrochloride	DAPI
mechanisms of action	MoA
50% growth inhibition	GI50
Developmental Therapeutics Program	DTP
National Cancer Institute	NCI
One-way analysis of variance	ANOVA
MHC proteins	pMHCs
area under the curve	AUC
immunocheckpoint inhibitor	ICIs
human leukocyte antigens	HLA
Janus kinase	JAK
signal transducer and activator of transcription 1	STAT1

## Sheet: S2
Supplementary Table 2. 37 CD74 clinical-relevant AS events on OncoSplicing
Gene_Symbol	Splice_Type	Splice_Event	Project
CD74	A3	alt_3prime_210967	SpIAdder
CD74	A3	alt_3prime_210979	SpIAdder
CD74	A3	alt_3prime_210985	SpIAdder
CD74	A3	alt_3prime_211033	SpIAdder
CD74	ES	exon_skip_445387	SpIAdder
CD74	ES	exon_skip_445390	SpIAdder
CD74	ES	exon_skip_445393	SpIAdder
CD74	ES	exon_skip_445401	SpIAdder
CD74	ES	exon_skip_445402	SpIAdder
CD74	ES	exon_skip_445406	SpIAdder
CD74	ES	exon_skip_445449	SpIAdder
CD74	IR	intron_retention_111331	SpIAdder
CD74	IR	intron_retention_111342	SpIAdder
CD74	IR	intron_retention_111343	SpIAdder
CD74	IR	intron_retention_111360	SpIAdder
CD74	AA	CD74_AA_99692	SpliceSeq
CD74	AT	CD74_AT_74073	SpliceSeq
CD74	AT	CD74_AT_74075	SpliceSeq
CD74	AT	CD74_AT_74076	SpliceSeq
CD74	ES	CD74_ES_115363	SpliceSeq
CD74	ES	CD74_ES_126825	SpliceSeq
CD74	ES	CD74_ES_152981	SpliceSeq
CD74	ES	CD74_ES_152982	SpliceSeq
CD74	ES	CD74_ES_152983	SpliceSeq
CD74	ES	CD74_ES_272695	SpliceSeq
CD74	ES	CD74_ES_272696	SpliceSeq
CD74	ES	CD74_ES_272697	SpliceSeq
CD74	ES	CD74_ES_74077	SpliceSeq
CD74	ES	CD74_ES_74078	SpliceSeq
CD74	ES	CD74_ES_74079	SpliceSeq
CD74	ES	CD74_ES_74080	SpliceSeq
CD74	ES	CD74_ES_74081	SpliceSeq
CD74	ES	CD74_ES_74082	SpliceSeq
CD74	ES	CD74_ES_74083	SpliceSeq
CD74	ES	CD74_ES_96965	SpliceSeq
CD74	ES	CD74_ES_99689	SpliceSeq
CD74	ES	CD74_ES_99691	SpliceSeq

## Sheet: S3
Supplementary Table 3:GO pathways enriched by the top 100 CD74 co-expressed genes identified on GEPIA2.0.
ONTOLOGY	ID	Description	GeneRatio	BgRatio	pvalue	p.adjust	qvalue	geneID	Count
BP	GO:0048002	antigen processing and presentation of peptide antigen	21/86	63/18800	1.24826e-34	1.70637e-31	1.10109e-31	HLA-DRA/HLA-DPB1/HLA-DMA/HLA-DPA1/HLA-DRB1/HLA-DOA/HLA-DQA1/HLA-E/HLA-DQB1/HLA-B/HLA-DQA2/B2M/HLA-DMB/IFI30/HLA-F/HLA-C/HLA-DRB5/HLA-A/HLA-DOB/TAPBP/CTSS	21
BP	GO:0002478	antigen processing and presentation of exogenous peptide antigen	18/86	38/18800	3.58705e-33	2.45175e-30	1.58208e-30	HLA-DRA/HLA-DPB1/HLA-DMA/HLA-DPA1/HLA-DRB1/HLA-DOA/HLA-DQA1/HLA-E/HLA-DQB1/HLA-DQA2/B2M/HLA-DMB/IFI30/HLA-F/HLA-DRB5/HLA-A/HLA-DOB/CTSS	18
BP	GO:0002443	leukocyte mediated immunity	34/86	457/18800	1.2279e-32	5.59514e-30	3.61046e-30	HLA-DRA/HLA-DPB1/HLA-DMA/HLA-DPA1/HLA-DRB1/HLA-DOA/HLA-DQA1/HLA-E/HLA-DQB1/IL12RB1/HLA-B/HLA-DQA2/TYROBP/B2M/HLA-DMB/CRTAM/C1QC/C1QB/HLA-F/LILRB4/ITGB2/SPI1/BTN3A2/BTN3A3/C1QA/FCGR3A/HLA-DRB5/TNFRSF1B/HLA-A/SLAMF6/PRF1/LAG3/HLA-DOB/KLRK1	34
BP	GO:0050863	regulation of T cell activation	31/86	342/18800	2.73204e-32	8.97289e-30	5.79007e-30	HLA-DRA/HLA-DPB1/HLA-DMA/HLA-DPA1/HLA-DRB1/HLA-DOA/HLA-DQA1/HLA-E/HLA-DQB1/IL12RB1/HLA-DQA2/B2M/HLA-DMB/CRTAM/TIGIT/SIRPG/CD4/IRF1/LAPTM5/LILRB4/CD86/TNFAIP8L2/HLA-DRB5/TNFRSF1B/CCL5/HLA-A/LAG3/ICOS/HLA-DOB/KLRK1/CD6	31
BP	GO:1903037	regulation of leukocyte cell-cell adhesion	31/86	344/18800	3.28196e-32	8.97289e-30	5.79007e-30	HLA-DRA/HLA-DPB1/HLA-DMA/HLA-DPA1/HLA-DRB1/HLA-DOA/HLA-DQA1/HLA-E/HLA-DQB1/IL12RB1/HLA-DQA2/B2M/HLA-DMB/CRTAM/TIGIT/SIRPG/CD4/IRF1/LAPTM5/LILRB4/ITGB2/CD86/TNFAIP8L2/HLA-DRB5/CCL5/HLA-A/LAG3/ICOS/HLA-DOB/KLRK1/CD6	31
BP	GO:0002449	lymphocyte mediated immunity	31/86	365/18800	2.10575e-31	4.79761e-29	3.09583e-29	HLA-DRA/HLA-DPB1/HLA-DMA/HLA-DPA1/HLA-DRB1/HLA-DOA/HLA-DQA1/HLA-E/HLA-DQB1/IL12RB1/HLA-B/HLA-DQA2/B2M/HLA-DMB/CRTAM/C1QC/C1QB/HLA-F/LILRB4/BTN3A2/BTN3A3/C1QA/FCGR3A/HLA-DRB5/TNFRSF1B/HLA-A/SLAMF6/PRF1/LAG3/HLA-DOB/KLRK1	31
CC	GO:0042611	MHC protein complex	18/89	25/19594	5.06542e-38	5.77458e-36	3.09257e-36	HLA-DRA/HLA-DPB1/HLA-DMA/HLA-DPA1/HLA-DRB1/HLA-DOA/HLA-DQA1/HLA-E/HLA-DQB1/HLA-B/HLA-DQA2/B2M/HLA-DMB/HLA-F/HLA-C/HLA-DRB5/HLA-A/HLA-DOB	18
CC	GO:0042613	MHC class II protein complex	13/89	17/19594	3.28626e-28	1.87317e-26	1.00317e-26	HLA-DRA/HLA-DPB1/HLA-DMA/HLA-DPA1/HLA-DRB1/HLA-DOA/HLA-DQA1/HLA-DQB1/HLA-DQA2/B2M/HLA-DMB/HLA-DRB5/HLA-DOB	13
CC	GO:0071556	integral component of lumenal side of endoplasmic reticulum membrane	14/89	29/19594	3.99641e-26	1.13898e-24	6.09978e-25	HLA-DRA/HLA-DPB1/HLA-DPA1/HLA-DRB1/HLA-DQA1/HLA-E/HLA-DQB1/HLA-B/HLA-DQA2/HLA-F/HLA-C/HLA-DRB5/HLA-A/TAPBP	14
CC	GO:0098553	lumenal side of endoplasmic reticulum membrane	14/89	29/19594	3.99641e-26	1.13898e-24	6.09978e-25	HLA-DRA/HLA-DPB1/HLA-DPA1/HLA-DRB1/HLA-DQA1/HLA-E/HLA-DQB1/HLA-B/HLA-DQA2/HLA-F/HLA-C/HLA-DRB5/HLA-A/TAPBP	14
CC	GO:0098576	lumenal side of membrane	14/89	35/19594	1.16999e-24	2.66757e-23	1.42862e-23	HLA-DRA/HLA-DPB1/HLA-DPA1/HLA-DRB1/HLA-DQA1/HLA-E/HLA-DQB1/HLA-B/HLA-DQA2/HLA-F/HLA-C/HLA-DRB5/HLA-A/TAPBP	14
CC	GO:0012507	ER to Golgi transport vesicle membrane	14/89	62/19594	1.33119e-20	2.52925e-19	1.35454e-19	HLA-DRA/HLA-DPB1/HLA-DPA1/HLA-DRB1/HLA-DQA1/HLA-E/HLA-DQB1/HLA-B/HLA-DQA2/B2M/HLA-F/HLA-C/HLA-DRB5/HLA-A	14
MF	GO:0023026	MHC class II protein complex binding	14/88	27/18410	2.09508e-26	3.43593e-24	2.66847e-24	HLA-DRA/HLA-DPB1/HLA-DMA/HLA-DPA1/HLA-DRB1/HLA-DOA/HLA-DQA1/HLA-DQB1/HLA-DQA2/B2M/HLA-DMB/CD4/HLA-DRB5/HLA-DOB	14
MF	GO:0023023	MHC protein complex binding	14/88	36/18410	3.83314e-24	3.14318e-22	2.44111e-22	HLA-DRA/HLA-DPB1/HLA-DMA/HLA-DPA1/HLA-DRB1/HLA-DOA/HLA-DQA1/HLA-DQB1/HLA-DQA2/B2M/HLA-DMB/CD4/HLA-DRB5/HLA-DOB	14
MF	GO:0042605	peptide antigen binding	14/88	37/18410	6.14319e-24	3.35828e-22	2.60816e-22	HLA-DRA/HLA-DPB1/HLA-DPA1/HLA-DRB1/HLA-DQA1/HLA-E/HLA-DQB1/HLA-B/HLA-F/HLA-C/HLA-DRB5/HLA-A/TRAV12-2/TAPBP	14
MF	GO:0140375	immune receptor activity	17/88	148/18410	3.599e-19	1.47559e-17	1.146e-17	HLA-DRA/HLA-DPA1/HLA-DRB1/HLA-DOA/HLA-DQA1/CCR5/HLA-DQB1/IL12RB1/CXCR3/HLA-DQA2/CXCR6/CD4/IL10RA/FPR3/FCGR3A/HLA-DOB/KLRK1	17
MF	GO:0032395	MHC class II receptor activity	8/88	10/18410	8.78325e-18	2.88091e-16	2.23742e-16	HLA-DRA/HLA-DPA1/HLA-DRB1/HLA-DOA/HLA-DQA1/HLA-DQB1/HLA-DQA2/HLA-DOB	8
MF	GO:0003823	antigen binding	16/88	174/18410	1.61658e-16	4.41864e-15	3.43168e-15	HLA-DRA/HLA-DPB1/HLA-DPA1/HLA-DRB1/HLA-DQA1/HLA-E/HLA-DQB1/HLA-B/HLA-F/CD48/HLA-C/HLA-DRB5/HLA-A/LAG3/TRAV12-2/TAPBP	16

## Sheet: S4
Supplementary Table 4: The enrichment analysis of KEGG terms were analyzed by GSEA in pan-cancer.
ID	Description	setSize	enrichmentScore	NES	pvalue	p.adjust	qvalue	rank	leading_edge	core_enrichment
HALLMARK_INTERFERON_ALPHA_RESPONSE	HALLMARK_INTERFERON_ALPHA_RESPONSE	97	0.91405	2.10414	0.0104167	0.0298686	0.0144627	4044	tags=87%, list=7%, signal=81%	CXCL10/CD74/CXCL11/GBP4/SELL/PSMB9/LAMP3/C1S/EPSTI1/CASP1/TAP1/SAMD9L/IRF1/IFI27/BATF2/B2M/GBP2/IFIT3/IFI44L/CSF1/BST2/RSAD2/RTP4/PSMB8/IFI44/OASL/HLA-C/IFITM1/MX1/UBE2L6/UBA7/ISG15/NMI/IFIT2/CMPK2/IL4R/PARP14/WARS1/SAMD9/OAS1/IFIH1/IFI35/HERC6/CCRL2/IFITM3/TRIM21/IL15/DDX60/SP110/LPAR6/PSME2/TMEM140/LAP3/PLSCR1/IRF7/PARP9/IL7/ISG20/NCOA7/LY6E/TRIM14/STAT2/LGALS3BP/PARP12/DHX58/PSME1/IFITM2/IRF9/…
HALLMARK_INTERFERON_GAMMA_RESPONSE	HALLMARK_INTERFERON_GAMMA_RESPONSE	200	0.911434	2.12137	0.010101	0.0298686	0.0144627	4008	tags=84%, list=7%, signal=79%	CXCL9/GZMA/CCL5/CXCL10/HLA-DQA1/CD74/CXCL11/IDO1/HLA-DRB1/SLAMF7/IL2RB/HLA-DMA/GBP4/IRF8/PSMB9/FGL2/IL10RA/CIITA/CD69/C1S/CSF2RB/CD86/LCP2/EPSTI1/HLA-B/CASP1/IRF4/TAP1/SAMD9L/CD38/SOCS1/IRF1/ICAM1/C1R/CD40/NLRC5/VCAM1/CCL2/FPR1/HLA-A/ZBP1/SERPING1/IFI27/IL18BP/BATF2/B2M/TNFAIP3/IFIT3/IL15RA/IFI44L/APOL6/FCGR1A/CD274/BST2/OAS2/RSAD2/RTP4/PSMB8/SELP/SAMHD1/XCL1/IFI44/STAT1/PSMB10/OASL/STAT4/CMKLR1/…
HALLMARK_ALLOGRAFT_REJECTION	HALLMARK_ALLOGRAFT_REJECTION	200	0.906764	2.1105	0.010101	0.0298686	0.0144627	2953	tags=70%, list=5%, signal=66%	CXCL9/CXCL13/CD3D/CD2/CCL19/CD3E/GZMA/CCL5/HLA-DQA1/CD79A/LTB/CD74/HLA-DRA/CXCR3/GZMB/IL2RG/SIT1/LCK/PTPRC/CD8A/CCR5/HLA-DOA/IL2RB/PRF1/HLA-DMA/HLA-DMB/CD7/CD96/ITGB2/CD4/CD3G/IRF8/CD247/CTSS/CCL4/HCLS1/WAS/FYB1/ZAP70/SPI1/SRGN/CCL13/CCR2/CD86/LCP2/TRAT1/ITGAL/FASLG/CCL22/ITK/PRKCB/IL12RB1/NCF4/MAP4K1/IRF4/TAP1/CD40LG/HLA-DOB/FGR/IGSF6/SOCS1/CCR1/ICAM1/CRTAM/CD40/IL2RA/CCL2/IL18/LY86/HLA-A/HLA-E/…
HALLMARK_IL6_JAK_STAT3_SIGNALING	HALLMARK_IL6_JAK_STAT3_SIGNALING	87	0.888586	2.02558	0.0107527	0.0298686	0.0144627	4288	tags=76%, list=8%, signal=70%	CXCL9/CXCL13/CXCL10/LTB/CXCL11/IL2RG/EBI3/TNFRSF1B/CSF2RB/IL12RB1/CSF2RA/CD38/SOCS1/IRF1/CCR1/IL2RA/CD14/IL15RA/PIK3R5/PLA2G2A/CSF1/STAT1/IL1B/TLR2/FAS/HMOX1/ITGA4/IL18R1/IL4R/TNF/TGFB1/SOCS3/PIM1/CXCL1/IL1R2/OSMR/CSF3R/IL3RA/ACVRL1/A2M/IL6/IL1R1/CD36/IL7/IFNGR1/STAT2/MAP3K8/TNFRSF21/CCL7/IL9R/IRF9/JUN/TNFRSF12A/MYD88/IFNGR2/TNFRSF1A/CD44/PDGFC/CSF2/LEPR/TYK2/IL17RA/ITGB3/BAK1/STAT3/CXCL3
HALLMARK_INFLAMMATORY_RESPONSE	HALLMARK_INFLAMMATORY_RESPONSE	199	0.883962	2.04692	0.0102041	0.0298686	0.0144627	3903	tags=70%, list=7%, signal=66%	CXCL9/CCL5/CXCL10/CXCL11/LCK/IL7R/IL2RB/CCR7/CYBB/SELL/CD48/IL10RA/EBI3/LAMP3/GPR183/CD69/TNFRSF1B/CXCR6/PTAFR/RGS1/SLAMF1/LCP2/CCL22/LTA/IRF1/C3AR1/ICAM1/CD40/CCL2/CCL17/IL18/FPR1/CD14/TNFRSF9/IL15RA/PIK3R5/OLR1/CSF1/BST2/MARCO/EMP3/PTGER4/RTP4/LYN/GPR132/MSR1/CMKLR1/IL1B/NLRP3/TLR2/IFITM1/TLR1/KCNA3/STAB1/C5AR1/PDE4B/SELE/OSM/PDPN/CD82/CX3CL1/AXL/NMI/IL18R1/IL4R/TLR3/CD70/IL18RAP/TNFSF10/PLAUR/…

## Sheet: S5
Supplementary Table 5: The correlation between CD74 expression and 14 cancer functional statesfrom the CancerSEA database.
cancer	Angiogenesis	Apoptosis	CellCycle	Differentiation	DNAdamage	DNArepair	EMT	Hypoxia	Inflammation	Invasion	Metastasis	Proliferation	Quiescence	Stemness
ALL	0.161	0.388	0.493	0.251	0.117	0.172	0.402	0.161	0.266	0.225	0.027	0.416	0.457	0.037
AML	0.236	0.263	0.191	0.279	0.067	0.265	0.137	0.24	0.36	0.004	0.25	0.327	0.356	0.011
CML	0.134	0.053	0.267	0.081	0.161	0.133	0.015	0.085	0.076	0.138	0.136	0.204	0.214	0.023
CRC	0.019	0.003	0.145	0.091	0.003	0.092	0.053	0.078	0.014	0.09	0.054	0.101	0.013	0.07
BRCA	0.14	0.004	0.02	0.086	0.099	0.056	0.084	0.034	0.285	0.016	0.058	0.102	0.147	0.032
GBM	0.03	0.059	0.154	0.101	0.136	0.192	0.165	0.038	0.312	0.007	0.236	0.036	0.159	0.264
HNSCC	0.027	0.104	0.034	0.018	0.04	0.06	0.047	0.111	0.002	0.005	0.004	0.148	0.053	0.018
RCC	0.442	0.166	0.088	0.262	0.211	0.281	0.294	0.574	0.077	0.192	0.384	0.354	0.064	0.257
LUAD	0.103	0.16	0.185	0.081	0.055	0.065	0.077	0.012	0.039	0.061	0.036	0.106	0.054	0.074
NSCLC	0.279	0.064	0.271	0.016	0.499	0.305	0.287	0.256	0.184	0.227	0.369	0.272	0.026	0.326
OV	0.097	0.049	0.019	0.08	0.101	0.185	0.015	0.112	0.222	0.153	0.011	0.131	0.04	0.14
PC	0.123	0.228	0.163	0.158	0.022	0.071	0.004	0.078	0.397	0.117	0.184	0.331	0.169	0.048
MEL	0.303	0.16	0.082	0.268	0.023	0.116	0.318	0.218	0.427	0.125	0.41	0.023	0.343	0.006
RB	0.516	0.156	0.438	0.494	0.358	0.513	0.086	0.047	0.499	0.029	0.222	0.03	0.205	0.238
UM	0.099	0.46	0.366	0.284	0.503	0.589	0.27	0.389	0.226	0.485	0.443	0.178	0.391	0.08
